# Supplementary material for: A novel analytical method based on HPLC-PDA coupled post-column derivatization to evaluate the ability to inhibit tyrosine nitration in lotus leaf extracts
Source: Royal Society of Chemistry journal article supplement (doi:10.1039/c8ra07087c), 2018-01-01
Supplement: c8ra07087c1.pdf [file c8ra07087c1.pdf]

## Electronic Supplementary Information (ESI)

### Determination of ONOO<sup>-</sup> concentration

The concentration of ONOO<sup>-</sup> solution was identified by full wavelength scanning after diluting with 0.1 M NaOH solution. 0.1 M NaOH solution was taken as blank solution and spectra was detected from 200-400nm (**Fig. S1**). The maximum absorbance could be detected at 302nm wavelength and the ONOO<sup>-</sup> concentration could be calculated as follow:

$$C = Abs/1670 \times N \times 1000(mM)$$

Abs—Absorbance of ONOO<sup>-</sup> solution at 302nm wavelength;

N—Dilution multiple of ONOO<sup>-</sup> solution diluted by 0.1M NaOH solution.

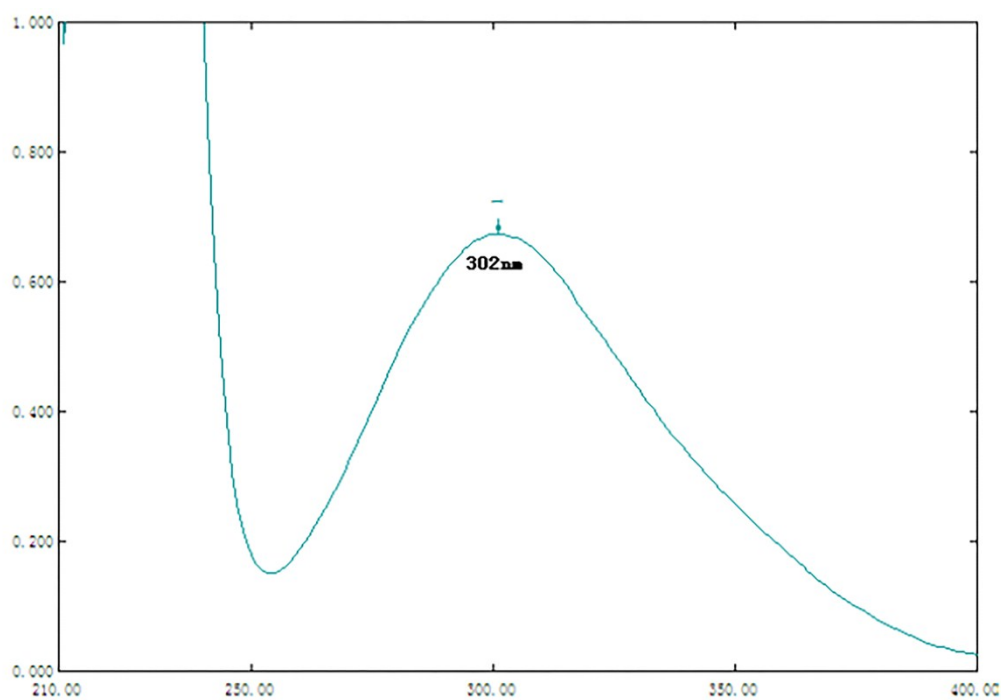

**Figure. S1.** Full wavelength scanning spectrum of ONOO<sup>-</sup> in the range from 200 to 400nm.
